# Supplementary material for: Ticks as novel sentinels to monitor environmental levels of per- and polyfluoroalkyl substances (PFAS)
Source: Royal Society of Chemistry journal article supplement (doi:10.1039/d1em00209k), 2021-01-01
Supplement: d1em00209k2.xlsx [file d1em00209k2.xlsx]

## Sheet: TableS3_Conc_ng.tick^-1
Concentration (ng/tick)
Location	PFBA	L-PFPrS	PFPeA	L-PFBS	FBSA	PFHxA	LPFHxS	PFHpA	PFECHS	6:2 FTS	PFHpS	PFOA	L-PFOS	PFNA	PFDA	L-PFDS	PFUdA	PFDoA	PFTrDA	PFTeDA	PFHxDA	PFODA	diSamPAP
FL - Sweetwater	NF	NF	<CAL	NF	NF	NF	NF	NF	NF	NF	NF	NF	<CAL	<CAL	<CAL	NF	0.00231306	<CAL	NF	NF	NF	NF	NF
FL - Sweetwater	NF	NF	<CAL	NF	NF	NF	<CAL	NF	NF	NF	NF	NF	NF	<CAL	<CAL	NF	<CAL	<CAL	0.00153012	NF	0.00160958	NF	NF
FL - Sweetwater	NF	<CAL	<CAL	NF	NF	NF	NF	NF	NF	NF	NF	NF	<CAL	NF	<CAL	NF	NF	NF	NF	<CAL	<CAL	NF	NF
FL - Sweetwater	NF	NF	<CAL	<CAL	0.0203962	NF	0.129866	<CAL	NF	NF	0.00910497	0.0641456	0.869846	0.0499856	0.0603906	NF	0.0208517	0.00936027	0.0022873	0.0526606	<CAL	NF	NF
FL - Sweetwater	NF	<CAL	<CAL	NF	NF	NF	NF	NF	NF	NF	0.0122591	NF	NF	NF	NF	NF	<CAL	<CAL	0.00180437	<CAL	0.00182807	NF	NF
FL - Sweetwater	NF	NF	<CAL	NF	NF	NF	NF	NF	NF	NF	NF	<CAL	NF	<CAL	0.00226006	NF	<CAL	NF	0.0015348	NF	<CAL	NF	NF
FL - Sweetwater	<CAL	NF	<CAL	NF	NF	NF	NF	NF	NF	NF	NF	NF	<CAL	<CAL	<CAL	NF	<CAL	<CAL	NF	<CAL	<CAL	NF	NF
FL - Sweetwater	NF	NF	<CAL	NF	NF	NF	NF	NF	NF	NF	NF	NF	<CAL	NF	<CAL	NF	<CAL	NF	NF	<CAL	0.00140876	NF	NF
FL - Sweetwater	NF	NF	<CAL	NF	NF	NF	<CAL	NF	NF	NF	NF	NF	NF	NF	NF	NF	NF	NF	NF	NF	0.00179908	NF	NF
FL - Sweetwater	NF	NF	<CAL	NF	NF	NF	NF	NF	NF	NF	NF	NF	<CAL	NF	NF	NF	<CAL	NF	NF	<CAL	<CAL	NF	NF
FL - Sweetwater	NF	NF	<CAL	<CAL	NF	NF	0.0617359	NF	NF	NF	0.0395873	0.0095605	4.98604	0.0731459	0.173199	NF	0.0814273	0.0401418	0.0261571	0.0125333	0.00262523	NF	NF
FL - Sweetwater	NF	NF	<CAL	<CAL	NF	<CAL	0.0784807	NF	0.0125943	NF	0.0494875	0.0265198	6.5712	0.172908	0.319621	NF	0.138418	0.0571044	0.0340504	0.0153842	0.00311042	NF	NF
FL - Sweetwater	NF	<CAL	<CAL	0.160028	<CAL	<CAL	0.0216818	NF	<CAL	NF	0.0623726	0.00521652	9.70525	0.133884	0.36498	0.193303	0.228403	0.16148	0.0755287	0.054636	0.0105702	0.00393538	NF
FL - Sweetwater	NF	NF	<CAL	<CAL	NF	<CAL	0.0546138	NF	0.0252381	<CAL	0.0607095	0.0161254	5.29034	0.0996986	0.172824	NF	0.150096	0.0861001	0.0892981	0.0485279	0.00421424	<CAL	NF
FL - Sweetwater	NF	NF	<CAL	0.0674083	NF	<CAL	0.0794789	<CAL	0.0183484	NF	0.0782863	0.00981958	19.0152	0.124929	0.313291	0.0901392	0.177289	0.0917373	0.120562	0.0338565	0.00362367	NF	NF
FL - Sweetwater	NF	NF	<CAL	<CAL	NF	NF	0.307961	NF	0.0354271	NF	0.180008	0.0363044	15.1671	0.167093	0.452733	<CAL	0.234879	0.155222	0.144093	0.0624757	0.0036802	NF	NF
FL - Sweetwater	NF	NF	<CAL	<CAL	NF	<CAL	NF	NF	NF	NF	0.00396474	0.00236611	1.07246	0.0271052	0.071148	NF	0.0571839	0.0292353	0.0149314	0.0116672	0.00181882	NF	NF
FL - Sweetwater	NF	NF	<CAL	<CAL	NF	<CAL	0.142316	<CAL	0.0182392	<CAL	0.0707257	0.041753	11.2168	0.1686	0.343312	NF	0.219527	0.142708	0.121424	0.0688332	0.0041597	NF	NF
FL - Sweetwater	NF	NF	<CAL	<CAL	NF	NF	0.0363518	NF	NF	NF	0.0118375	0.0261365	1.11245	0.0144642	0.0217022	NF	0.0149484	0.0155587	0.0109454	<CAL	0.00271508	NF	NF
FL - Sweetwater	NF	NF	<CAL	<CAL	NF	<CAL	0.0183479	NF	NF	NF	0.0213707	0.00565207	2.9534	0.0696597	0.158928	NF	0.0732842	0.0383839	0.0224883	0.0125364	0.00262146	NF	NF
FL - Archbold Station	NF	NF	<CAL	0.0177522	NF	NF	0.0150184	<CAL	NF	0.00842274	NF	0.0127118	0.155286	0.0298242	0.0212208	NF	0.0421554	0.028506	0.109887	0.0525022	0.00509225	NF	NF
FL - Archbold Station	0.0507685	NF	<CAL	0.0762975	NF	<CAL	0.270339	0.0707771	0.0131992	<CAL	0.0410964	0.025091	1.32555	0.0211962	0.0104681	NF	0.0217427	0.0156285	0.0695477	0.0769568	0.00344278	NF	NF
FL - Archbold Station	0.154446	NF	2.83371	0.230908	<CAL	0.015374	0.0968099	0.0997508	0.0232946	<CAL	0.00716657	0.201423	0.436461	0.0900266	0.0673365	<CAL	0.0573684	0.0277187	0.0574373	0.0446924	0.00252903	NF	NF
FL - Archbold Station	0.137368	NF	<CAL	0.0759233	NF	0.0326138	0.0700549	0.0519206	0.0286637	<CAL	0.00943957	0.054872	0.185093	0.0729041	0.0268697	NF	0.042195	0.029122	0.128238	0.0563205	0.00553106	NF	NF
FL - Archbold Station	0.017704	<CAL	<CAL	<CAL	NF	NF	0.0763621	<CAL	0.0217037	NF	0.0119898	0.0281739	0.636048	0.0745317	0.0384788	NF	0.0585293	0.0417537	0.231927	0.0573222	0.00653774	NF	NF
FL - Archbold Station	<CAL	NF	<CAL	<CAL	NF	<CAL	0.0219578	0.00882576	NF	<CAL	NF	0.0204155	0.162493	0.0311791	0.0176238	NF	0.0318608	0.0224107	0.0879791	0.0374392	0.00365968	NF	NF
FL - Archbold Station	0.0524811	NF	<CAL	<CAL	NF	NF	0.0437779	<CAL	0.0237104	<CAL	NF	0.01545	0.237932	0.0512163	0.0333739	NF	0.0493066	0.0249668	0.0594295	0.0432558	0.0031894	NF	NF
FL - Archbold Station	0.0190277	<CAL	<CAL	<CAL	NF	<CAL	0.124661	<CAL	<CAL	<CAL	<CAL	0.0142916	0.122567	0.0139756	0.0078961	NF	0.00963851	0.00633396	0.0387418	<CAL	0.00269417	NF	NF
FL - Archbold Station	0.116258	NF	<CAL	<CAL	NF	NF	0.0858541	0.00954481	0.0154588	<CAL	0.0150117	0.023884	0.419755	0.0748127	0.0455346	NF	0.0810719	0.0474181	0.30831	0.0800254	0.00973132	NF	NF
FL - Archbold Station	0.039316	NF	<CAL	NF	NF	NF	0.03165	0.00896221	0.0252025	<CAL	0.0053031	0.0144827	0.22167	0.0490398	0.0289207	NF	0.0529569	0.0310998	0.113038	0.0523945	0.00506489	NF	NF
FL - Archbold Station	<CAL	<CAL	<CAL	0.1311	NF	0.0436557	0.155836	0.0913138	0.038756	<CAL	0.00597217	0.0841812	0.329098	0.0739503	0.0394488	NF	0.0595083	0.0330311	0.0707978	0.0537	0.0021563	NF	NF
FL - Archbold Station	0.0701039	<CAL	<CAL	<CAL	<CAL	NF	0.11464	0.00919084	0.0303782	<CAL	NF	0.0243249	0.428052	0.0906831	0.051716	NF	0.0760715	0.0521174	0.0863783	0.0823712	0.00424616	NF	NF
FL - Archbold Station	0.0234626	NF	<CAL	NF	NF	NF	0.0427993	<CAL	0.0135593	<CAL	0.00533239	0.0180519	0.136069	0.0370037	0.0201653	NF	0.0292213	0.0145029	0.0582885	0.0192041	0.00268677	NF	NF
NY - Ferncliff	<CAL	<CAL	<CAL	NF	<CAL	NF	<CAL	NF	NF	NF	<CAL	0.03419	<CAL	0.046235	0.0205891	NF	0.0286154	0.0125344	0.0124808	<CAL	0.00172615	NF	NF
NY - Ferncliff	NF	<CAL	<CAL	NF	<CAL	NF	NF	NF	NF	NF	NF	NF	NF	NF	<CAL	NF	0.00503983	0.00426414	0.00507255	NF	0.00522184	0.00738102	NF
NY - Ferncliff	NF	<CAL	<CAL	NF	NF	NF	0.054491	NF	NF	NF	NF	0.0221623	0.0529427	0.130475	0.128805	NF	0.207066	0.0685758	0.0474277	<CAL	0.00224339	NF	NF
NY - Ferncliff	<CAL	<CAL	<CAL	<CAL	<CAL	NF	NF	<CAL	NF	NF	NF	<CAL	<CAL	0.00760165	0.00761554	NF	0.0185497	0.0155034	0.0397181	0.013409	0.00196475	NF	NF
NY - Ferncliff	NF	NF	NF	NF	0.020848	NF	NF	NF	NF	NF	NF	0.0473135	0.0529251	0.169069	0.140942	NF	0.207616	0.070506	0.0518742	0.0219229	0.00246218	NF	NF
NY - Ferncliff	NF	<CAL	<CAL	NF	<CAL	NF	NF	NF	NF	<CAL	NF	<CAL	NF	0.00172548	0.00454681	NF	0.00803723	0.0104935	0.0272111	0.0101548	0.0167319	0.0138284	NF
NY - Ferncliff	NF	NF	<CAL	NF	NF	NF	NF	NF	NF	0.00828039	NF	NF	<CAL	0.0163201	0.0229765	NF	0.0364439	0.0236792	0.0308632	0.0107006	0.00154977	NF	NF
NY - Ferncliff	NF	<CAL	<CAL	NF	NF	NF	NF	NF	NF	NF	NF	NF	NF	NF	NF	NF	<CAL	<CAL	NF	NF	<CAL	NF	NF
NY - Newburgh	NF	0.0133045	<CAL	NF	NF	NF	NF	NF	NF	0.01699	NF	NF	0.0635558	<CAL	0.010968	NF	0.0264088	0.015218	0.0114662	<CAL	0.0024642	NF	NF
NY - Newburgh	NF	NF	<CAL	NF	<CAL	NF	NF	NF	NF	NF	NF	NF	<CAL	NF	<CAL	NF	0.00230595	<CAL	0.00268852	NF	<CAL	NF	NF
NY - Newburgh	NF	<CAL	<CAL	NF	NF	NF	NF	NF	NF	<CAL	NF	NF	<CAL	<CAL	<CAL	NF	0.00274463	0.0028249	0.0036438	NF	<CAL	NF	NF
NY - Newburgh	NF	<CAL	<CAL	NF	NF	NF	NF	NF	NF	NF	NF	NF	NF	NF	<CAL	NF	0.00390695	0.00369058	0.00699399	NF	NF	NF	NF
NY - Newburgh	NF	NF	<CAL	NF	NF	NF	NF	NF	NF	<CAL	NF	NF	NF	NF	<CAL	NF	0.00402844	0.00226373	0.00581894	<CAL	NF	NF	NF
NY - Newburgh	NF	NF	<CAL	NF	NF	NF	NF	NF	NF	NF	NF	NF	NF	NF	NF	NF	0.00382755	0.00464727	0.00543396	<CAL	0.00216057	NF	NF
NY - Newburgh	NF	<CAL	<CAL	NF	NF	NF	NF	NF	NF	NF	NF	NF	NF	<CAL	NF	NF	0.0033535	0.00434845	0.0125408	<CAL	NF	NF	NF
NY - Newburgh	NF	NF	<CAL	NF	NF	NF	NF	NF	NF	NF	NF	NF	NF	NF	<CAL	NF	0.0044036	0.00368421	0.00468693	NF	<CAL	NF	NF
NY - Newburgh	NF	NF	<CAL	NF	NF	NF	NF	NF	NF	NF	NF	NF	NF	<CAL	NF	NF	NF	<CAL	NF	NF	<CAL	NF	NF
NY - Newburgh	NF	<CAL	<CAL	NF	NF	NF	NF	NF	NF	NF	NF	NF	NF	NF	NF	NF	<CAL	NF	NF	NF	0.00341307	0.00163135	NF
NY - Newburgh	NF	NF	<CAL	NF	NF	NF	NF	NF	NF	NF	NF	NF	NF	<CAL	NF	NF	0.0034044	0.00482435	0.00517343	NF	<CAL	NF	NF
NY - Newburgh	NF	NF	<CAL	NF	NF	NF	NF	NF	<CAL	NF	NF	NF	NF	NF	NF	NF	<CAL	NF	NF	NF	0.00146871	NF	NF
NY - Newburgh	NF	<CAL	<CAL	NF	NF	NF	NF	NF	NF	<CAL	NF	0.00418086	0.055128	0.0058653	0.011491	NF	0.0210134	0.0118628	0.00713165	NF	0.0018488	NF	NF
NY - Newburgh	NF	<CAL	<CAL	<CAL	<CAL	NF	NF	NF	NF	NF	NF	NF	NF	0.00162573	NF	NF	0.00270817	0.00150501	0.00565155	NF	0.00157165	NF	NF
NY - Newburgh	NF	NF	<CAL	NF	NF	NF	NF	NF	NF	0.0203888	NF	NF	0.0329109	<CAL	NF	NF	0.00735809	0.0126422	0.0364793	0.0192358	0.00359138	NF	NF
NY - Newburgh	NF	NF	<CAL	NF	<CAL	NF	NF	NF	NF	NF	NF	NF	NF	0.00164051	0.00343839	NF	0.0083628	0.0116477	0.00901493	<CAL	0.00572792	0.00676127	NF
NY - Newburgh	NF	<CAL	<CAL	NF	NF	NF	NF	NF	NF	NF	NF	NF	NF	NF	NF	NF	0.00425059	0.00507839	0.00939198	0.013144	0.00187771	NF	NF
NY - Newburgh	NF	NF	<CAL	NF	NF	NF	NF	NF	NF	NF	NF	NF	NF	0.00142158	0.00282135	NF	0.00737988	0.00669474	0.0086008	<CAL	0.00231578	NF	NF
NY - Newburgh	NF	NF	<CAL	NF	<CAL	NF	NF	NF	NF	NF	NF	NF	NF	<CAL	NF	NF	0.00446553	0.00365758	0.0137318	<CAL	0.00566555	0.00338434	NF
NY - Newburgh	NF	<CAL	<CAL	NF	NF	NF	NF	NF	NF	NF	NF	NF	NF	NF	<CAL	NF	0.00560756	0.00621372	0.00528111	<CAL	<CAL	NF	NF
NF = peak not found
<CAL = peak area ratio (analyte/internal standard) below range of calibration curve

## Sheet: TableS4_Conc_ng.mg^-1
Concentration (ng/mg tick)
Location	Tick weight (mg)	PFBA	L-PFPrS	PFPeA	L-PFBS	FBSA	PFHxA	LPFHxS	PFHpA	PFECHS	6:2 FTS	PFHpS	PFOA	L-PFOS	PFNA	PFDA	L-PFDS	PFUdA	PFDoA	PFTrDA	PFTeDA	PFHxDA	PFODA	diSamPAP
FL - Sweetwater	2.9	NF	NF	<CAL	NF	NF	NF	NF	NF	NF	NF	NF	NF	<CAL	<CAL	<CAL	NF	0.000797608	<CAL	NF	NF	NF	NF	NF
FL - Sweetwater	2.92	NF	NF	<CAL	NF	NF	NF	<CAL	NF	NF	NF	NF	NF	NF	<CAL	<CAL	NF	<CAL	<CAL	0.000524013	NF	0.000551227	NF	NF
FL - Sweetwater	2.6	NF	<CAL	<CAL	NF	NF	NF	NF	NF	NF	NF	NF	NF	<CAL	NF	<CAL	NF	NF	NF	NF	<CAL	<CAL	NF	NF
FL - Sweetwater	1.16	NF	NF	<CAL	<CAL	0.0175829	NF	0.111953	<CAL	NF	NF	0.00784911	0.055298	0.749867	0.043091	0.0520608	NF	0.0179756	0.00806919	0.00197181	0.045397	<CAL	NF	NF
FL - Sweetwater	2.53	NF	<CAL	<CAL	NF	NF	NF	NF	NF	NF	NF	0.00484548	NF	NF	NF	NF	NF	<CAL	<CAL	0.000713189	<CAL	0.000722558	NF	NF
FL - Sweetwater	2.27	NF	NF	<CAL	NF	NF	NF	NF	NF	NF	NF	NF	<CAL	NF	<CAL	0.00099562	NF	<CAL	NF	0.000676122	NF	<CAL	NF	NF
FL - Sweetwater	2.965	<CAL	NF	<CAL	NF	NF	NF	NF	NF	NF	NF	NF	NF	<CAL	<CAL	<CAL	NF	<CAL	<CAL	NF	<CAL	<CAL	NF	NF
FL - Sweetwater	0.89	NF	NF	<CAL	NF	NF	NF	NF	NF	NF	NF	NF	NF	<CAL	NF	<CAL	NF	<CAL	NF	NF	<CAL	0.00158287	NF	NF
FL - Sweetwater	1.345	NF	NF	<CAL	NF	NF	NF	<CAL	NF	NF	NF	NF	NF	NF	NF	NF	NF	NF	NF	NF	NF	0.0013376	NF	NF
FL - Sweetwater	1.86	NF	NF	<CAL	NF	NF	NF	NF	NF	NF	NF	NF	NF	<CAL	NF	NF	NF	<CAL	NF	NF	<CAL	<CAL	NF	NF
FL - Sweetwater	4.705	NF	NF	<CAL	<CAL	NF	NF	0.0131213	NF	NF	NF	0.00841387	0.00203199	1.05973	0.0155464	0.0368117	NF	0.0173066	0.00853173	0.00555943	0.00266382	0.000557967	NF	NF
FL - Sweetwater	6.615	NF	NF	<CAL	<CAL	NF	<CAL	0.0118641	NF	0.00190391	NF	0.00748111	0.00400905	0.993379	0.0261388	0.0483176	NF	0.0209248	0.00863256	0.00514745	0.00232566	0.000470208	NF	NF
FL - Sweetwater	6.31	NF	<CAL	<CAL	0.0253611	<CAL	<CAL	0.0034361	NF	<CAL	NF	0.00988472	0.000826707	1.53807	0.0212178	0.0578415	0.0306344	0.036197	0.0255911	0.0119697	0.00865863	0.00167516	0.000623674	NF
FL - Sweetwater	8.04	NF	NF	<CAL	<CAL	NF	<CAL	0.00679276	NF	0.00313906	<CAL	0.00755093	0.00200564	0.658003	0.0124003	0.0214955	NF	0.0186686	0.010709	0.0111067	0.0060358	0.00052416	<CAL	NF
FL - Sweetwater	8.185	NF	NF	<CAL	0.00823559	NF	<CAL	0.00971031	<CAL	0.00224171	NF	0.0095646	0.0011997	2.32318	0.0152631	0.0382762	0.0110127	0.0216602	0.011208	0.0147297	0.0041364	0.00044272	NF	NF
FL - Sweetwater	8.43	NF	NF	<CAL	<CAL	NF	NF	0.0365315	NF	0.0042025	NF	0.0213532	0.00430657	1.79918	0.0198212	0.053705	<CAL	0.0278623	0.0184131	0.0170929	0.00741111	0.00043656	NF	NF
FL - Sweetwater	7.625	NF	NF	<CAL	<CAL	NF	<CAL	NF	NF	NF	NF	0.000519966	0.00031031	0.140651	0.00355478	0.00933088	NF	0.00749953	0.00383414	0.00195821	0.00153013	0.000238534	NF	NF
FL - Sweetwater	9.89	NF	NF	<CAL	<CAL	NF	<CAL	0.0143899	<CAL	0.00184421	<CAL	0.00715124	0.00422174	1.13415	0.0170475	0.034713	NF	0.0221968	0.0144295	0.0122774	0.00695988	0.000420596	NF	NF
FL - Sweetwater	3.725	NF	NF	<CAL	<CAL	NF	NF	0.00975887	NF	NF	NF	0.00317785	0.00701652	0.298646	0.00388302	0.0058261	NF	0.004013	0.00417682	0.00293835	<CAL	0.000728881	NF	NF
FL - Sweetwater	5.815	NF	NF	<CAL	<CAL	NF	<CAL	0.00315527	NF	NF	NF	0.00367509	0.00097198	0.507894	0.0119793	0.0273307	NF	0.0126026	0.00660085	0.00386729	0.00215587	0.00045081	NF	NF
NY - Ferncliff	0.515	<CAL	<CAL	<CAL	NF	<CAL	NF	<CAL	NF	NF	NF	<CAL	0.0663883	<CAL	0.0897766	0.0399789	NF	0.055564	0.0243386	0.0242345	<CAL	0.00335174	NF	NF
NY - Ferncliff	0.455	NF	<CAL	<CAL	NF	<CAL	NF	NF	NF	NF	NF	NF	NF	NF	NF	<CAL	NF	0.0110765	0.00937175	0.0111485	NF	0.0114766	0.016222	NF
NY - Ferncliff	0.7	NF	<CAL	<CAL	NF	NF	NF	0.0778442	NF	NF	NF	NF	0.0316604	0.0756325	0.186393	0.184007	NF	0.295809	0.0979655	0.0677538	<CAL	0.00320485	NF	NF
NY - Ferncliff	1.61	<CAL	<CAL	<CAL	<CAL	<CAL	NF	NF	<CAL	NF	NF	NF	<CAL	<CAL	0.00472152	0.00473015	NF	0.0115216	0.00962945	0.0246696	0.00832856	0.00122034	NF	NF
NY - Ferncliff	0.865	NF	NF	NF	NF	0.0241017	NF	NF	NF	NF	NF	NF	0.0546977	0.0611851	0.195456	0.162939	NF	0.240019	0.0815098	0.0599701	0.0253444	0.00284646	NF	NF
NY - Ferncliff	1.68	NF	<CAL	<CAL	NF	<CAL	NF	NF	NF	NF	<CAL	NF	<CAL	NF	0.00102707	0.00270644	NF	0.00478407	0.00624614	0.0161971	0.00604454	0.00995946	0.00823121	NF
NY - Ferncliff	0.74	NF	NF	<CAL	NF	NF	NF	NF	NF	NF	0.0111897	NF	NF	<CAL	0.0220542	0.0310493	NF	0.0492485	0.0319989	0.0417071	0.0144603	0.00209428	NF	NF
NY - Ferncliff	1.445	NF	<CAL	<CAL	NF	NF	NF	NF	NF	NF	NF	NF	NF	NF	NF	NF	NF	<CAL	<CAL	NF	NF	<CAL	NF	NF
NY - Newburgh	0.34	NF	0.0391309	<CAL	NF	NF	NF	NF	NF	NF	0.0499706	NF	NF	0.186929	<CAL	0.0322589	NF	0.0776729	0.0447588	0.0337241	<CAL	0.00724766	NF	NF
NY - Newburgh	0.27	NF	NF	<CAL	NF	<CAL	NF	NF	NF	NF	NF	NF	NF	<CAL	NF	<CAL	NF	0.00854056	<CAL	0.00995749	NF	<CAL	NF	NF
NY - Newburgh	1.215	NF	<CAL	<CAL	NF	NF	NF	NF	NF	NF	<CAL	NF	NF	<CAL	<CAL	<CAL	NF	0.00225896	0.00232502	0.00299901	NF	<CAL	NF	NF
NY - Newburgh	0.08	NF	<CAL	<CAL	NF	NF	NF	NF	NF	NF	NF	NF	NF	NF	NF	<CAL	NF	0.0488368	0.0461323	0.0874249	NF	NF	NF	NF
NY - Newburgh	0.69	NF	NF	<CAL	NF	NF	NF	NF	NF	NF	<CAL	NF	NF	NF	NF	<CAL	NF	0.00583832	0.00328077	0.00843324	<CAL	NF	NF	NF
NY - Newburgh	1.565	NF	NF	<CAL	NF	NF	NF	NF	NF	NF	NF	NF	NF	NF	NF	NF	NF	0.00244572	0.0029695	0.00347218	<CAL	0.00138055	NF	NF
NY - Newburgh	0.445	NF	<CAL	<CAL	NF	NF	NF	NF	NF	NF	NF	NF	NF	NF	<CAL	NF	NF	0.00753595	0.00977179	0.0281816	<CAL	NF	NF	NF
NY - Newburgh	0.5	NF	NF	<CAL	NF	NF	NF	NF	NF	NF	NF	NF	NF	NF	NF	<CAL	NF	0.0088072	0.00736842	0.00937385	NF	<CAL	NF	NF
NY - Newburgh	1.165	NF	NF	<CAL	NF	NF	NF	NF	NF	NF	NF	NF	NF	NF	<CAL	NF	NF	NF	<CAL	NF	NF	<CAL	NF	NF
NY - Newburgh	0.345	NF	<CAL	<CAL	NF	NF	NF	NF	NF	NF	NF	NF	NF	NF	NF	NF	NF	<CAL	NF	NF	NF	0.00989297	0.00472855	NF
NY - Newburgh	0.8	NF	NF	<CAL	NF	NF	NF	NF	NF	NF	NF	NF	NF	NF	<CAL	NF	NF	0.0042555	0.00603044	0.00646679	NF	<CAL	NF	NF
NY - Newburgh	1.035	NF	NF	<CAL	NF	NF	NF	NF	NF	<CAL	NF	NF	NF	NF	NF	NF	NF	<CAL	NF	NF	NF	0.00141905	NF	NF
NY - Newburgh	0.745	NF	<CAL	<CAL	NF	NF	NF	NF	NF	NF	<CAL	NF	0.0056119	0.0739973	0.00787289	0.0154242	NF	0.0282059	0.0159233	0.00957268	NF	0.00248162	NF	NF
NY - Newburgh	1.21	NF	<CAL	<CAL	<CAL	<CAL	NF	NF	NF	NF	NF	NF	NF	NF	0.00134357	NF	NF	0.00223816	0.00124381	0.0046707	NF	0.00129889	NF	NF
NY - Newburgh	1.73	NF	NF	<CAL	NF	NF	NF	NF	NF	NF	0.0117854	NF	NF	0.0190237	<CAL	NF	NF	0.00425323	0.00730762	0.0210863	0.0111189	0.00207594	NF	NF
NY - Newburgh	2.275	NF	NF	<CAL	NF	<CAL	NF	NF	NF	NF	NF	NF	NF	NF	0.000721103	0.00151138	NF	0.00367596	0.00511987	0.00396261	<CAL	0.00251777	0.00297199	NF
NY - Newburgh	5.345	NF	<CAL	<CAL	NF	NF	NF	NF	NF	NF	NF	NF	NF	NF	NF	NF	NF	0.000795246	0.00095012	0.00175715	0.00245912	0.000351303	NF	NF
NY - Newburgh	0.905	NF	NF	<CAL	NF	NF	NF	NF	NF	NF	NF	NF	NF	NF	0.0015708	0.00311751	NF	0.00815456	0.0073975	0.00950365	<CAL	0.00255887	NF	NF
NY - Newburgh	3.02	NF	NF	<CAL	NF	<CAL	NF	NF	NF	NF	NF	NF	NF	NF	<CAL	NF	NF	0.00147865	0.00121112	0.00454697	<CAL	0.00187601	0.00112064	NF
NY - Newburgh	2.305	NF	<CAL	<CAL	NF	NF	NF	NF	NF	NF	NF	NF	NF	NF	NF	<CAL	NF	0.00243278	0.00269576	0.00229115	<CAL	<CAL	NF	NF
NF = peak not found
<CAL = peak area ratio (analyte/internal standard) below range of calibration curve
